# Supplementary material for: Room-temperature conversion of CO2 into quinazoline-2,4(1H,3H)-dione using deep eutectic solvents at atmospheric pressure with high efficiency
Source: Royal Society of Chemistry journal article supplement (doi:10.1039/d2re00137c), 2022-01-01
Supplement: d2re00137c1.pdf [file d2re00137c1.pdf]

## Supporting Information

### Room-temperature conversion of CO<sub>2</sub> into quinazoline-2,4(1H,3H)-dione by deep eutectic solvents at atmospheric pressure with high efficiency

Yu Chen<sup>\*a</sup>, Chong Liu<sup>a</sup>, Yaoting Duan<sup>a</sup>, Dongkun Yu<sup>b</sup>, Zhenghui Liu<sup>c</sup>, Yuting Li<sup>a</sup>, Ruifen Shi<sup>b</sup>, Yuting Guo<sup>a</sup>, Tiancheng Mu<sup>\*b</sup>

<sup>a</sup> Department of Chemistry and Material Science, Langfang Normal University, Langfang 065000, Hebei, P.R. China. E-mail: yuchen@iccas.ac.cn; Phone: +86-316-2188211; Fax: +86-316-2112462. Zip: 065000.

<sup>b</sup> Department of Chemistry, Renmin University of China, Beijing 100872, P.R. China. E-mail: tcmu@ruc.edu.cn; Phone: +86-10-62514925; Fax: +86-10-62516444. Zip: 100872.

<sup>c</sup> Department of Chemistry, Taizhou University, Taizhou 318000, Zhejiang, P. R. China. E-mail: liuzhenghui@126.com; Tel: +86-576-88661988; Fax: +86-576-88661988. Zip: 318000.

### Contents of SI

|                                                                                                                 |   |
|-----------------------------------------------------------------------------------------------------------------|---|
| Table S1. Structure, name, purity and CAS of chemicals investigated.....                                        | 2 |
| Figure S1. Effect of time on the yield of CO <sub>2</sub> conversion at 30 °C.....                              | 3 |
| Figure S2. Effect of time on the yield of CO <sub>2</sub> conversion at 60 °C.....                              | 3 |
| Table S2. Fitted parameters for the relationship between yields and time at 30 °C and 60 °C. <sup>a</sup> ..... | 4 |

Table S1. Structure, name, purity and CAS of chemicals investigated.

| NO. | Structure                                                                           | Name                                      | Purity        | CAS        |
|-----|-------------------------------------------------------------------------------------|-------------------------------------------|---------------|------------|
| 1   |    | 2-aminobenzonitrile                       | 98%           | 1885-29-6  |
| 2   |    | 1,5-diazabicyclo[4.3.0]non-5-ene<br>(DBN) | 98%           | 3001-72-7  |
| 3   |    | 2-amino-5-chlorobenzonitrile              | 98%           | 5922-60-1  |
| 4   |    | 2-amino-4-methylbenzonitrile              | 98%           | 26830-96-6 |
| 5   |    | dimethylsulfoxide-d6 (d-DMSO)             | 99.8 atom % D | 2206-27-1  |
| 6   |    | glycerol (GLY)                            | 99%           | 56-81-5    |
| 7   |  | methyl tert-butyl ether                   | 99%           | 1634-04-4  |
| 8   |  | ethylene glycol (EG)                      | 99%           | 107-21-1   |
| 9   |  | 2-amino-4,5-dimethoxybenzonitrile         | 98%           | 26961-27-3 |
| 10  |  | 2-amino-5-fluorobenzonitrile              | 98%           | 61272-77-3 |
| 11  |  | 2-amino-5-bromobenzonitrile               | 98%           | 39263-32-6 |
| 12  |  | 2-amino-4-chlorobenzonitrile              | 98%           | 38487-86-4 |
| 13  |  | 2-amino-5-methylbenzonitrile              | 98%           | 5925-93-9  |
| 14  |  | triethanolamine (TEA)                     | 99%           | 102-71-6   |

**Table S2. Fitted parameters for the relationship between yields and time at 30 °C and 60 °C.<sup>a</sup>**

| <i>T</i><br>/ °C | <i>a</i><br>/ % | <i>b</i><br>/ h <sup>-1</sup> | <i>R</i> <sup>2</sup> |
|------------------|-----------------|-------------------------------|-----------------------|
| 30               | 50.2            | 0.0618                        | 0.9987                |
| 60               | 100             | 0.1189                        | 0.9234                |

<sup>a</sup>  $y = a(1 - e^{-bt})$ , *y* and *t* represent yield and time, respectively. *a* and *b* are the fitted parameters.
